# Supplementary material for: Application of Machine-Learning Algorithms for Better Understanding the Properties of Liquisolid Systems Prepared with Three Mesoporous Silica Based Carriers
Source: MDPI journal article supplement (doi:10.3390/pharmaceutics15030741), 2023-02-23
Supplement: s1 [file s1]

**Table S1.** Modeling aspects for each of the tested models.

| Model                  | Modeling aspects                                                                                                                                                                                                              |
|------------------------|-------------------------------------------------------------------------------------------------------------------------------------------------------------------------------------------------------------------------------|
| Linear Regression      | Regularization - L1 Lasso regression, $\alpha=0.0001$ ; default data preprocessor.                                                                                                                                            |
| Neural networks        | 100 neurons in the hidden layers, activation function - Rectified Linear Unit (ReLU), solver – Stochastic Gradient Descent, Regularization - $\alpha=0.0001$ , maximal number of iterations – 200; default data preprocessor. |
| Decision Tree          | Min. number of instances in leaves – 2, do not split subsets smaller than 5, maximal three depth 100; stop classification when majority reaches 95%.                                                                          |
| Random forest          | Number of trees – 10, limit depth of individual trees – 3, do not split subsets smaller than 5; default data preprocessor.                                                                                                    |
| Support Vector Machine | Cost (C) – 1, regression loss epsilon ( $\epsilon$ ) – 0.10; Kernel – RBF; numerical tolerance – 0.001, iteration limit – 100; default data preprocessor.                                                                     |
| AdaBoost               | Base estimator – tree, number of estimators – 50, learning rate – 1.0; Boosting method: Regression loss function – exponential, Classification algorithm – SAMME.R; default data preprocessor.                                |
| Naïve Bayes            | Default data preprocessor.                                                                                                                                                                                                    |
| Logistic Regression    | Regularization - L1 Lasso regression, $C=0.600$ ; default data preprocessor.                                                                                                                                                  |

**Table S2.** Composition of liquisolid admixtures and values of tableting process parameters.

| Carrier             | R <sup>1</sup> | L <sub>f</sub> <sup>2</sup> | PEG (%) | CP <sup>3</sup> (MPa)    | TS <sup>4</sup> (MPa) | DS <sup>5</sup> (MPa) | ES <sup>6</sup> (MPa) | NWC <sup>7</sup> (J) | ER <sup>8</sup> (%) |
|---------------------|----------------|-----------------------------|---------|--------------------------|-----------------------|-----------------------|-----------------------|----------------------|---------------------|
| Neusilin®<br>US2    | 10             | 0.7                         | 38.9    | 186.9 ± 0.3 <sup>9</sup> | 2.5 ± 0.6             | 1.6 ± 0.1             | 10.2 ± 1.2            | 2.8 ± 0.1            | 46.3 ± 1.3          |
|                     | 10             | 0.8                         | 42.1    | 189.2 ± 0.5              | 2.9 ± 0.6             | 2.3 ± 0.2             | 9.0 ± 0.6             | 2.4 ± 0.0            | 42.2 ± 1.9          |
|                     | 10             | 1.0                         | 47.6    | 190.1 ± 2.6              | 1.7 ± 0.5             | 1.2 ± 0.2             | 7.8 ± 0.8             | 1.5 ± 0.0            | 36.9 ± 3.7          |
|                     | 20             | 0.7                         | 40.0    | 190.3 ± 1.3              | 3.8 ± 0.5             | 1.6 ± 0.0             | 11.7 ± 1.1            | 2.5 ± 0.1            | 45.7 ± 3.9          |
|                     | 20             | 0.8                         | 43.2    | 191.0 ± 0.8              | 3.1 ± 0.4             | 2.6 ± 0.0             | 9.3 ± 0.4             | 2.2 ± 0.0            | 41.5 ± 1.9          |
|                     | 20             | 1.0                         | 48.8    | 188.2 ± 1.6              | 2.0 ± 0.1             | 1.8 ± 0.3             | 7.3 ± 0.4             | 1.4 ± 0.1            | 35.4 ± 3.5          |
|                     | 30             | 0.7                         | 40.4    | 190.3 ± 0.3              | 4.3 ± 0.3             | 1.9 ± 0.2             | 11.3 ± 0.5            | 2.5 ± 0.0            | 42.4 ± 0.5          |
|                     | 30             | 0.8                         | 43.6    | 191.3 ± 0.4              | 2.8 ± 0.4             | 2.5 ± 0.1             | 8.8 ± 0.1             | 2.3 ± 0.0            | 42.7 ± 1.8          |
|                     | 30             | 1.0                         | 49.2    | 192.5 ± 0.1              | 2.2 ± 0.4             | 2.3 ± 0.1             | 8.4 ± 0.6             | 1.4 ± 0.0            | 43.8 ± 0.9          |
| Syloid®<br>XDP 3150 | 10             | 0.6                         | 35.3    | 175.7 ± 0.4              | 1.1 ± 0.2             | 4.8 ± 0.3             | 5.1 ± 0.1             | 1.6 ± 0.1            | 43.7 ± 1.9          |
|                     | 10             | 0.7                         | 38.9    | 177.9 ± 0.2              | 1.1 ± 0.1             | 4.7 ± 0.2             | 5.3 ± 0.3             | 1.3 ± 0.0            | 36.4 ± 1.0          |
|                     | 20             | 0.6                         | 35.3    | 176.2 ± 0.2              | 0.9 ± 0.1             | 6.5 ± 0.2             | 6.9 ± 0.2             | 1.5 ± 0.0            | 39.6 ± 0.9          |
|                     | 20             | 0.7                         | 38.9    | 178.1 ± 0.3              | 0.9 ± 0.1             | 4.5 ± 0.3             | 5.6 ± 0.2             | 1.2 ± 0.0            | 36.2 ± 0.7          |
|                     | 30             | 0.6                         | 36.7    | 176.5 ± 0.1              | 1.0 ± 0.1             | 4.1 ± 0.1             | 4.7 ± 0.1             | 1.5 ± 0.0            | 42.4 ± 1.8          |
|                     | 30             | 0.7                         | 40.4    | 178.3 ± 0.3              | 1.0 ± 0.0             | 3.1 ± 0.0             | 4.3 ± 0.1             | 1.2 ± 0.0            | 49.4 ± 2.3          |
| Syloid®<br>XDP 3050 | 10             | 0.6                         | 35.3    | 176.1 ± 0.3              | 1.9 ± 0.3             | 4.5 ± 0.3             | 5.2 ± 0.1             | 1.5 ± 0.1            | 41.4 ± 1.0          |
|                     | 10             | 0.7                         | 38.9    | 178.2 ± 0.1              | 1.8 ± 0.1             | 3.1 ± 0.2             | 4.8 ± 0.1             | 1.2 ± 0.0            | 34.7 ± 0.8          |
|                     | 10             | 0.8                         | 42.1    | 181.3 ± 0.3              | 1.5 ± 0.1             | 2.6 ± 0.0             | 3.7 ± 0.1             | 0.9 ± 0.0            | 53.3 ± 2.3          |
|                     | 20             | 0.6                         | 35.3    | 176.6 ± 0.1              | 2.0 ± 0.1             | 4.5 ± 0.3             | 5.2 ± 0.1             | 1.4 ± 0.0            | 50.3 ± 1.1          |
|                     | 20             | 0.7                         | 38.9    | 178.9 ± 0.2              | 1.8 ± 0.1             | 4.7 ± 0.1             | 6.3 ± 0.1             | 1.2 ± 0.0            | 35.3 ± 1.2          |
|                     | 20             | 0.8                         | 43.2    | 183.4 ± 0.1              | 1.4 ± 0.0             | 2.4 ± 0.0             | 3.3 ± 0.1             | 0.8 ± 0.0            | 51.5 ± 5.0          |
|                     | 20             | 0.9                         | 46.2    | 189.9 ± 0.6              | 1.0 ± 0.0             | 1.5 ± 0.0             | 2.8 ± 0.1             | 0.4 ± 0.0            | 27.1 ± 1.9          |
|                     | 30             | 0.6                         | 36.7    | 176.2 ± 0.0              | 1.9 ± 0.2             | 4.3 ± 0.3             | 5.1 ± 0.0             | 1.5 ± 0.0            | 41.3 ± 0.2          |
|                     | 30             | 0.7                         | 40.4    | 180.0 ± 0.2              | 1.8 ± 0.3             | 2.8 ± 0.0             | 4.3 ± 0.1             | 1.1 ± 0.0            | 31.7 ± 1.7          |
|                     | 30             | 0.8                         | 43.6    | 184.2 ± 0.2              | 1.3 ± 0.1             | 2.4 ± 0.0             | 3.2 ± 0.1             | 0.7 ± 0.0            | 53.4 ± 0.4          |

<sup>1</sup> carrier to coating material ratio; <sup>2</sup> liquid load factor; <sup>3</sup> compression pressure; <sup>4</sup> tensile strength; <sup>5</sup> detachment stress; <sup>6</sup> ejection stress; <sup>7</sup> net work of compression; <sup>8</sup> elastic recovery; <sup>9</sup> all the values are presented as mean value ± standard deviation obtained during compaction at a compression load of 500kg.
